# Supplementary material
Source: PubMed Central journal article supplement (PMC5875342)
Supplement: jamacardiol-e175365-s001.pdf [file jamacardiol-e175365-s001.pdf]

## Supplementary Online Content

Tsimploulis A, Lam PH, Arundel C, et al. Systolic blood pressure and outcomes in patients with heart failure with preserved ejection fraction. *JAMA Cardiol*. Published online February 14, 2018. doi:10.1001/jamacardio.2017.5365

**eTable.** Outcomes by Systolic Blood Pressure (SBP) in Propensity Score Matched Patients with Heart Failure with Ejection Fraction  $\geq 50\%$ , in the Main Cohort and Three Sensitivity Cohorts

**eFigure 1.** Flow Chart Displaying Assembly of Propensity Score Matched Cohorts of Patients With Heart Failure and Left Ventricular Ejection Fraction  $\geq 50\%$ , by Systolic Blood Pressure (SBP)  $< 120$  vs  $\geq 120$  mm Hg

**eFigure 2.** Love Plot Displaying Absolute Standardized Differences Comparing 58 Baseline Characteristics Between Patients With Heart Failure And Left Ventricular Ejection Fraction  $\geq 50\%$  and Systolic Blood Pressure  $< 120$  vs  $\geq 120$  mm Hg, Before and After Propensity Score Matching

This supplementary material has been provided by the authors to give readers additional information about their work.

**eTable.** Outcomes by Systolic Blood Pressure (SBP) in Propensity Score Matched Patients With Heart Failure with Ejection Fraction  $\geq 50\%$ , in the Main Cohort and Three Sensitivity Cohorts

|                                                  | Hazard ratio associated with SBP <120 mm Hg (95% confidence interval) |                           |                           |                           |
|--------------------------------------------------|-----------------------------------------------------------------------|---------------------------|---------------------------|---------------------------|
| Cohort type                                      | Main cohort                                                           | Sensitivity cohorts       |                           |                           |
| Admission to discharge SBP variation             | $\leq 20$ mm Hg                                                       | >20 mm Hg                 | Regardless*               | Regardless*               |
| N for matched cohort                             | 1802                                                                  | 2232                      | 4582                      | 2958                      |
| Independent variable                             | Discharge SBP                                                         | Discharge SBP             | Discharge SBP             | Admission SBP             |
| <u>30 days</u>                                   |                                                                       |                           |                           |                           |
| All-cause mortality                              | 2.07 (1.45–2.95); p<0.001                                             | 1.48 (0.99–2.21); p=0.055 | 1.56 (1.22–1.99); p<0.001 | 2.18 (1.66–2.87); p<0.001 |
| All-cause readmission                            | 1.24 (1.03–1.50); p=0.024                                             | 1.11 (0.93–1.33); p=0.244 | 1.12 (1.00–1.27); p=0.057 | 1.29 (1.12–1.49); p=0.001 |
| Heart failure readmission                        | 1.47 (1.08–2.01); p=0.016                                             | 1.20 (0.85–1.70); p=0.300 | 1.31 (1.05–1.62); p=0.016 | 1.60 (1.25–2.05); p<0.001 |
| All-cause readmission or all-cause mortality     | 1.35 (1.13–1.61); p=0.001                                             | 1.14 (0.96–1.35); p=0.138 | 1.16 (1.04–1.30); p=0.010 | 1.42 (1.25–1.62); p<0.001 |
| Heart failure readmission or all-cause mortality | 1.71 (1.34–2.18); p<0.001                                             | 1.30 (1.00–1.71); p=0.054 | 1.37 (1.16–1.62); p<0.001 | 1.89 (1.56–2.28); p<0.001 |
| <u>1 year</u>                                    |                                                                       |                           |                           |                           |
| All-cause mortality                              | 1.36 (1.16–1.59); p<0.001                                             | 1.25 (1.06–1.48); p=0.009 | 1.16 (1.05–1.29); p=0.005 | 1.65 (1.46–1.88); p<0.001 |
| All-cause readmission                            | 1.13 (1.01–1.26); p=0.041                                             | 1.10 (0.99–1.22); p=0.066 | 1.06 (0.98–1.13); p=0.130 | 1.14 (1.05–1.25); p=0.003 |
| Heart failure readmission                        | 1.11 (0.93–1.33); p=0.230                                             | 1.14 (0.97–1.35); p=0.102 | 1.05 (0.94–1.17); p=0.395 | 1.17 (1.02–1.34); p=0.022 |
| All-cause readmission or all-cause               | 1.18 (1.06–1.32); p=0.002                                             | 1.12 (1.02–1.24); p=0.021 | 1.08 (1.01–1.16); p=0.024 | 1.24 (1.14–1.34); p<0.001 |

|                                                  |                           |                           |                           |                           |
|--------------------------------------------------|---------------------------|---------------------------|---------------------------|---------------------------|
| mortality                                        |                           |                           |                           |                           |
| Heart failure readmission or all-cause mortality | 1.21 (1.07–1.38); p=0.004 | 1.14 (1.01–1.29); p=0.041 | 1.08 (1.00–1.18); p=0.059 | 1.40 (1.27–1.55); p<0.001 |
| <u>Overall</u>                                   |                           |                           |                           |                           |
| All-cause mortality                              | 1.17 (1.05–1.30); p=0.005 | 1.10 (0.99–1.22); p=0.065 | 1.09 (1.02–1.17); p=0.013 | 1.28 (1.18–1.40); p<0.001 |
| All-cause readmission                            | 1.09 (0.99–1.21); p=0.088 | 1.09 (1.00–1.19); p=0.065 | 1.04 (0.98–1.11); p=0.169 | 1.11 (1.03–1.20); p=0.007 |
| Heart failure readmission                        | 1.06 (0.92–1.22); p=0.412 | 1.14 (1.01–1.29); p=0.039 | 1.04 (0.95–1.13); p=0.425 | 1.09 (0.97–1.21); p=0.139 |
| All-cause readmission or all-cause mortality     | 1.12 (1.02–1.23); p=0.015 | 1.10 (1.01–1.20); p=0.022 | 1.06 (1.00–1.13); p=0.046 | 1.18 (1.10–1.28); p<0.001 |
| Heart failure readmission or all-cause mortality | 1.12 (1.01–1.24); p=0.028 | 1.12 (1.02–1.23); p=0.014 | 1.07 (1.00–1.14); p=0.046 | 1.24 (1.15–1.34); p<0.001 |

\*Includes all patients regardless of admission to discharge SBP variation.

**eFigure 1.** Flow Chart Displaying Assembly of Propensity Score Matched Cohorts of Patients With Heart Failure and Left Ventricular Ejection Fraction  $\geq 50\%$ , by Systolic Blood Pressure (SBP)  $< 120$  vs  $\geq 120$  mm Hg

**Supplemental Figure 1. Assembly of Study Cohorts**

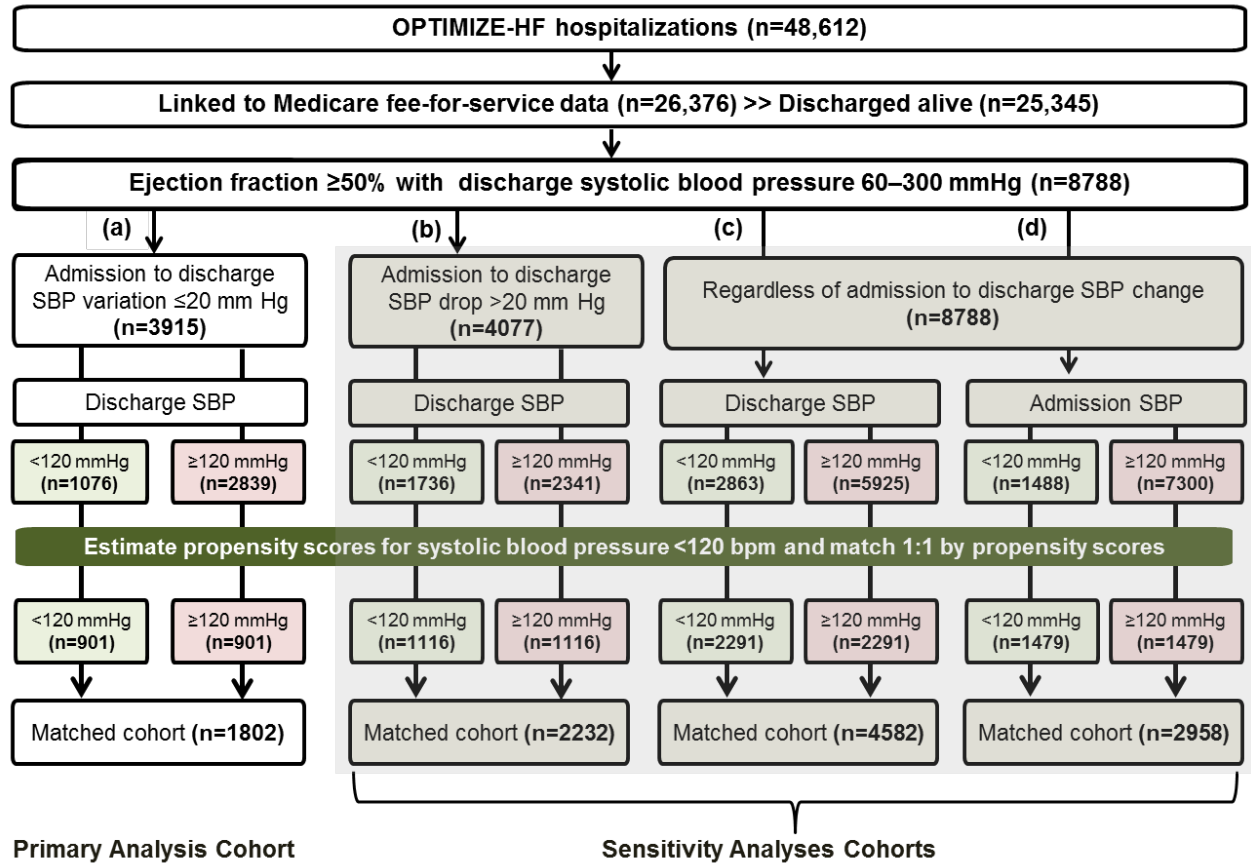

**eFigure 2.** Love plot displaying absolute standardized differences comparing 58 baseline characteristics between patients with heart failure and left ventricular ejection fraction  $\geq 50\%$  and systolic blood pressure  $< 120$  versus  $\geq 120$  mm Hg, before and after propensity score matching

## Supplemental Figure 2. Love Plot for Balance in Baseline Characteristics

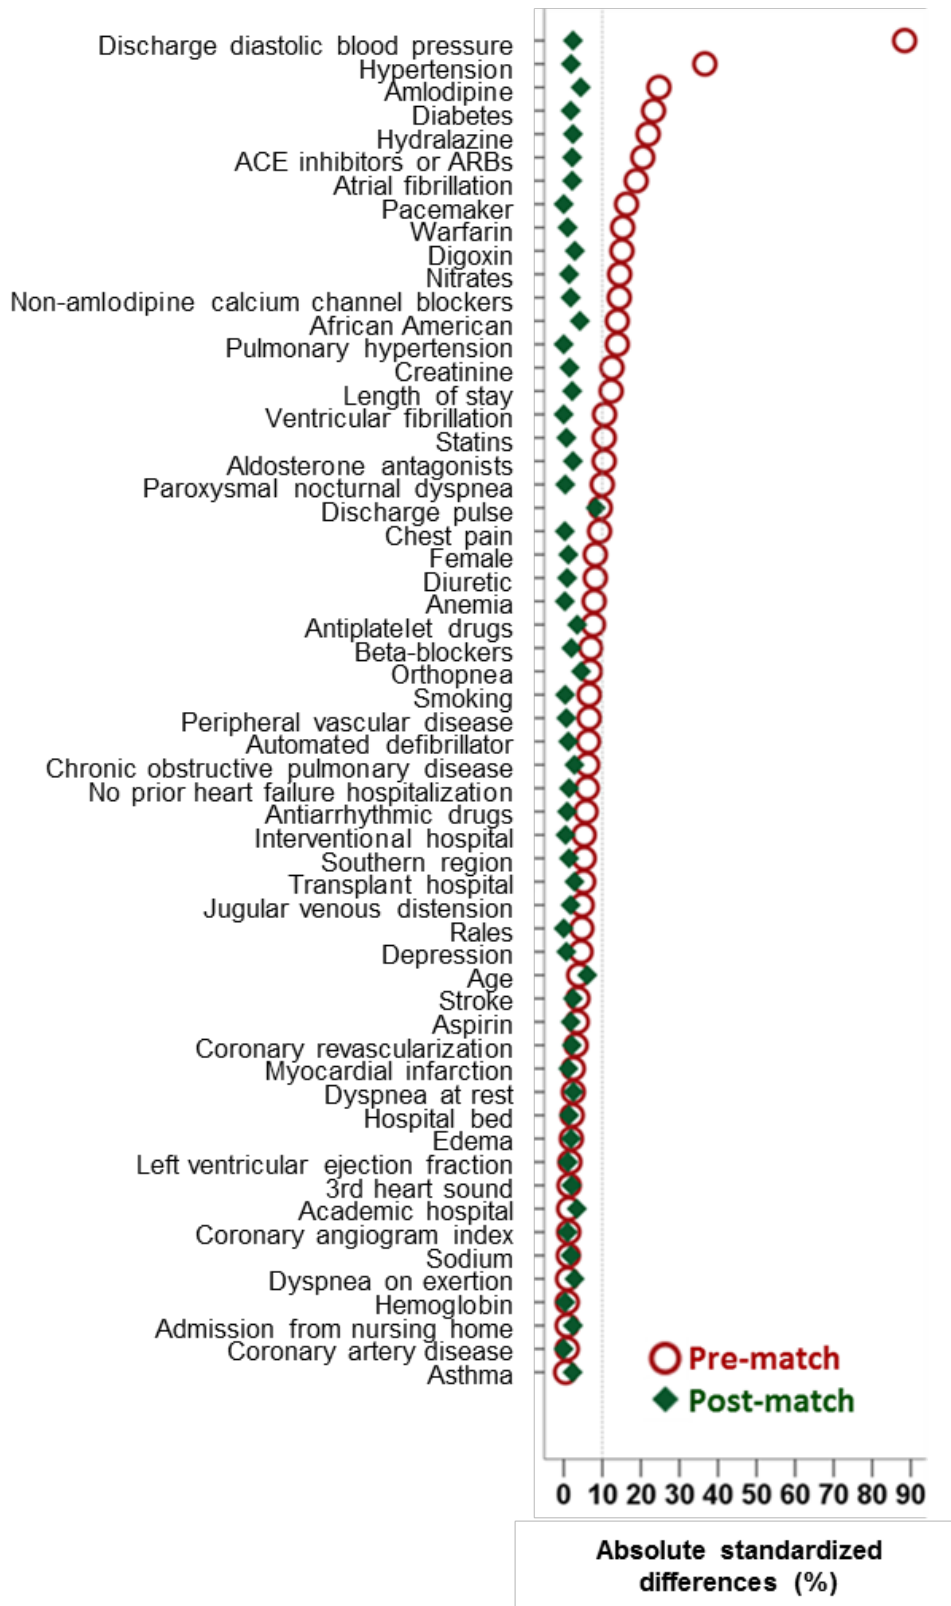

Abbreviations: ACE, angiotensin-converting enzyme; ARB, angiotensin receptor blockers)
